# Supplementary material for: Digital Pathology Predicts Immunotherapy Response and Maps Spatial Biomarkers in Gastric Cancer
Source: Research Square preprint supplement (doi:10.21203/rs.3.rs-6772872/v1), 2025-06-29
Supplement: Supplementary file 1 [file d0b19d27401117333037a0e8.docx]

**Supplementary Materials**

**Supplementary Figure 1. Histologic features associated with ICI response in the Ajou validation cohort identified through expert review of high-attention patches**

Representative patches from responders and non-responders exhibit characteristic patterns: fibrosis and SRCs are predominant in non-responders, while hyperchromasia and enlarged nuclei are more commonly observed in responders. Whole-slide heatmaps depict the spatial distributions of each feature within WSIs, which reflect the histologic heterogeneity associated with treatment outcomes.

**Supplementary Figure 2. Histologic feature distribution and spatial localization in the TCGA cohort**

AI-derived histologic predictions on TCGA slides were used to visualize pathologist-verified patch-level features, including fibrosis and SRCs (non-responders) and nuclear hyperchromasia and enlargement (responders). Spatial distribution maps reveal distinct tissue regions enriched with these features, suggesting that, even in treatment-naïve samples, these morphologic patterns align with predicted response to ICIs.

**Supplementary Figure 3. Cell-type–resolved GSEA of spatial transcriptomic profiles from nivolumab-treated gastric cancer patients in the Ajou University Xenium cohort**

GSEA was performed separately for tumor cells (left), fibrohistiocytic cells (center), and lymphocytes (right), comparing the responders and non-responders. In the tumor cells, the responders showed enrichment of epithelial polarity pathways, such as apical junction and apical surface, whereas non-responders exhibited trends in metabolic and hormonal signaling enrichment. In fibrohistiocytes, E2F targets and the G2/M checkpoint were elevated in responders, indicating proliferative remodeling, whereas non-responders showed upregulation of TGF-β signaling, WNT/β-catenin signaling, EMT, and hypoxia. In lymphocyte clusters, responders were enriched in immune activation signatures, such as IFN- and inflammatory responses, whereas non-responders showed upregulation of immunosuppressive or stromal-related pathways, including TGF-β signaling and hypoxia. These patterns highlight distinct transcriptional programs in the tumor, stromal, and immune compartments associated with response to ICI therapy.

**Supplementary Table 1. Demographics and clinical features of responders *vs*. non-responders (CNUHH)**

| Variables | Overall | Responder | Nonresponder | *p*-value |
| --- | --- | --- | --- | --- |
| n | 107 | 53 | 54 |  |
| Age (mean [SD]) | 60.04 (10.86) | 57.75 (10.16) | 62.28 (11.14) |  |
| Sex (%) |  |  |  | 0.381 |
| Male | 68 (63.6) | 31 (58.5) | 37 (68.5) |  |
| Female | 39 (36.4) | 22 (41.5) | 17 (31.5) |  |
| Specimen (%) |  |  |  | 0.692 |
| Stomach | 101 (94.4) | 51 (96.2) | 50 (92.6) |  |
| Non-stomach | 6 (5.6) | 2 (3.8) | 4 (7.4) |  |
| WHO classification (%) |  |  |  | 0.316 |
| Tubular adenocarcinoma | 50 (46.7) | 22 (41.5) | 28 (51.9) |  |
| Poorly cohesive carcinoma | 47 (43.9) | 24 (45.3) | 23 (42.6) |  |
| Mixed carcinoma | 8 (7.5) | 6 (11.3) | 2 (3.7) |  |
| Mucinous carcinoma | 1 (0.9) | 0 (0.0) | 1 (1.9) |  |
| Neuroendocrine carcinoma | 1 (0.9) | 1 (1.9) | 0 (0.0) |  |
| Lymphovascular invasion (%) |  |  |  | 0.79 |
| Present | 22 (20.6) | 10 (18.9) | 12 (22.2) |  |
| Not identified | 14 (13.1) | 7 (13.2) | 7 (13.0) |  |
| NA | 71 (66.4) | 36 (67.9) | 35 (64.8) |  |
| Perineural invasion (%) |  |  |  | 0.643 |
| Present | 30 (28.0) | 14 (26.4) | 16 (29.6) |  |
| Not identified | 8 (7.5) | 3 (5.7) | 5 (9.3) |  |
| NA | 69 (64.5) | 36 (67.9) | 33 (61.1) |  |
| PD-L1 immunohistochemistry (%) |  |  |  | 0.034 |
| CPS ≥ 5 | 12 (11.2) | 12 (22.6) | 0 (0.0) |  |
| CPS < 5 | 6 (5.6) | 4 (7.5) | 2 (3.7) |  |
| NA | 89 (83.2) | 37 (69.8) | 52 (96.3) |  |
| ICI treatment regimen |  |  |  | < 0.001 |
| Nivolumab alone | 60 | 17 | 43 |  |
| Nivolumab + Oxaliplatin | 37 | 30 | 7 |  |
| Nivolumab + Capecitabine + Oxaliplatin | 10 | 6 | 4 |  |

NA: not available; CPS: combined positive score; ICI: immune checkpoint inhibitor

**Supplementary Table 2. Demographics and clinical features of responders *vs*. nonresponders (AUH)**

| Variable | Overall | Responder | Nonresponder | *p*-value |
| --- | --- | --- | --- | --- |
| n | 127 | 91 | 36 |  |
| Age (mean [SD]) | 56.43 [45.17, 67.69] | 56.46 [45.18, 67.74] | 56.36 [45.00, 67.72] |  |
| Sex (%) |  |  |  | 0.417 |
| Male | 80 (63.0) | 55 (60.4) | 25 (69.4) |  |
| Female | 47 (37.0) | 36 (39.6) | 11 (30.6) |  |
| Specimen (%) |  |  |  | 0.639 |
| Stomach | 99 (78.0) | 72 (79.1) | 27 (75.0) |  |
| Non-stomach | 28 (22.0) | 19 (20.9) | 9 (25.0) |  |
| WHO classification (%) |  |  |  | 0.276 |
| Tubular adenocarcinoma | 46 (36.2) | 29 (31.9) | 17 (47.2) |  |
| Poorly cohesive carcinoma | 60 (47.2) | 47 (51.6) | 13 (36.1) |  |
| Mixed adenocarcinoma | 18 (14.2) | 13 (14.3) | 5 (13.9) |  |
| Gastric carcinoma with lymphoid stroma | 1 (0.8) | 1 (1.1) | 0 (0.0) |  |
| Mucinous adenocarcinoma | 1 (0.8) | 0 (0.0) | 1 (0.8) |  |
| Hepatoid adenocarcinoma | 1 (0.8) | 1 (1.1) | 0 (0.0) |  |
| Lauren classification (%) |  |  |  | 0.222 |
| Intestinal type | 46 (36.2) | 29 (31.9) | 17 (47.2) |  |
| Diffuse type | 60 (47.2) | 47 (51.6) | 13 (36.1) |  |
| Not applicable | 3 (2.4) | 2 (2.2) | 1 (2.8) |  |
| Lymphovascular invasion |  |  |  | 0.483 |
| Present | 47 (37.0) | 34 (37.4) | 13 (36.1) |  |
| Not identified | 14 (11.) | 12 (13.2) | 2 (5.6) |  |
| NA | 66 (52.0) | 45 (49.5) | 21 (58.3) |  |
| Perineural invasion |  |  |  | 0.755 |
| Present | 40 (31.5) | 31 (34.1) | 9 (25.0) |  |
| Not identified | 21 (16.5) | 15 (16.5) | 6 (16.7) |  |
| NA | 66 (52.0) | 45 (49.5) | 21 (58.3) |  |
| PD-L1 immunohistochemistry (%)  (PD-L1_22c3) |  |  |  | 0.314 |
| CPS ≥ 10 | 50 (39.4) | 41 (45.1) | 9 (25.0) |  |
| 1 < CPS < 10 | 30 (23.6) | 23 (25.3) | 7 (19.4) |  |
| CPS < 1 | 8 (6.3) | 8 (8.8) | 0 (0.0) |  |
| NA | 39 (30.7) | 19 (20.9) | 20 (55.6) |  |
| ICI treatment regimen |  |  |  | < 0.001 |
| Nivolumab alone | 19 (15.0) | 5 (5.5) | 14 (38.9) |  |
| Nivolumab + Oxaliplatin | 42 (33.1) | 32 (35.2) | 10 (27.8) |  |
| Nivolumab + Capecitabine + Oxaliplatin | 65 (51.2) | 53 (58.2) | 12 (33.3) |  |
| NA | 1 (0.8) | 1 (1.1) | 0 (0.0) |  |

NA: not available; CPS: combined positive score; ICI: immune checkpoint inhibitor

**Supplementary Table 3. Demographics and clinical features of responders *vs*. nonresponders (Stanford)**

| Variables | Overall | Responder | Non-responder | *p*-value |
| --- | --- | --- | --- | --- |
| n | 18 | 8 | 10 |  |
| Age (mean [SD]) | 71.00 [58.00, 78.00] | 74.00 [56.00, 79.00] | 69.00 [62.00, 77.00] |  |
| Sex (%) |  |  |  | 0.245 |
| Male | 15 (83.3) | 6 (75.0) | 9 (90.0) |  |
| Female | 3 (16.7) | 2 (25.4) | 1 (10.0) |  |
| Specimen (%) |  |  |  | 0.049 |
| Stomach | 11 (61.1) | 9 (81.8) | 2 (28.6) |  |
| Non-stomach | 7 (38.9) | 2 (18.2) | 5 (71.4) |  |
| WHO classification (%) |  |  |  | 0.388 |
| Tubular adenocarcinoma | 11 (61.1) | 7 (63.6) | 4 (57.1) |  |
| Poorly cohesive carcinoma | 4 (22.2) | 3 (27.3) | 1 (14.3) |  |
| Papillary adenocarcinoma | 1 (5.6) | 0 (0.0) | 1 (14.3) |  |
| Gastric carcinoma with lymphoid stroma | 1 (5.6) | 1 (9.1) | 0 (0.0) |  |
| Mixed carcinoma | 1 (5.6) | 0 (0.0) | 1 (14.3) |  |
| Lauren classification (%) |  |  |  | 0.792 |
| Intestinal type | 12 (66.7) | 7 (63.6) | 5 (71.4) |  |
| Diffuse type | 4 (22.2) | 3 (27.3) | 1 (14.3) |  |
| Not applicable | 2 (11.1) | 1 (9.1) | 1 (14.3) |  |
| Pathologic grade |  |  |  | 0.851 |
| Well-differentiated | 2 (11.1) | 1 (9.1) | 1 (14.3) |  |
| Moderately differentiated | 7 (38.9) | 4 (36.4) | 3 (42.9) |  |
| Poorly differentiated | 8 (44.4) | 5 (45.5) | 3 (42.9) |  |
| Not applicable | 2 (11.1) | 1 (9.1) | 0 (0.0) |  |
| PD-L1 immunohistochemistry (%) |  |  |  | 0.05 |
| CPS ≥ 10 | 7 (38.9) | 5 (45.5) | 2 (28.6) |  |
| 1 ≤ CPS < 10 | 4 (22.2) | 4 (36.4) | 0 (0.0) |  |
| CPS < 1 | 0 (0.0) | 0 (0.0) | 0 ( 0.0) |  |
| NA | 7 (39.8) | 2 (18.2) | 5 (71.4) |  |
| ICI treatment regimen |  |  |  | 0.168 |
| Pembrolizumab | 14 (77.8) | 8 ( 4.6) | 6 (85.7) |  |
| Nivolumab + Oxaliplatin (FOLFOX) | 3 (16.7) | 3 (27.3) | 0 (0.0) |  |
| Nivolumab + Irinotecan (FOLFIRI) | 1 (5.6) | 0 (0.0) | 1 (14.3) |  |

NA: not available; CPS: combined positive score; ICI: immune checkpoint inhibitor

**Supplementary Table 4. Performance of foundation models and MIL approaches on ICI response prediction in internal test cohort**

|  | UNI | GP | L-DINO |
| --- | --- | --- | --- |
| ABMIL | **0.746 (0.608–0.885)** | 0.697 (0.546–0.847) | 0.722 (0.572–0.872) |
| ACMIL | **0.835 (0.718–0.952)** | 0.811 (0.690–0.932) | 0.764 (0.626–0.902) |
| CLAM_MB | **0.844 (0.732–0.956)** | 0.833 (0.714–0.951) | 0.717 (0.569–0.865) |
| CLAM_SB | 0.787 (0.655–0.919) | **0.832 (0.715–0.947)** | 0.741 (0.596–0.886) |
| DSMIL | 0.691 (0.541–0.841) | 0.682 (0.528–0.837) | 0.615 (0.452–0.779) |
| GABMIL | **0.759 (0.619–0.900)** | 0.716 (0.568–0.865) | 0.741 (0.603–0.880) |
| MaxMIL | 0.572 (0.420–0.752) | **0.674 (0.520–0.827)** | 0.610 (0.453–0.776) |
| TransMIL | **0.842 (0.725–0.958)** | 0.761 (0.627–0.895) | 0.718 (0.572–0.864) |

**Supplementary Table 5. Performance metrics for MIL approaches based on the GigaPath foundation model for ICI response prediction**

| GigaPath | AUC | Accuracy | Sensitivity | Specificity | Positive predictive value | Negative predictive value |
| --- | --- | --- | --- | --- | --- | --- |
| ABMIL | 0.697 (0.546–0.847) | 0.687 (0.554–0.812) | 0.580 (0.387–0.766) | 0.790 (0.627–0.927) | 0.723 (0.489–0.909) | 0.692 (0.521–0.850) |
| ACMIL | 0.811 (0.690–0.932) | 0.775 (0.650–0.883) | 0.767 (0.587–0.923) | 0.780 (0.599–0.935) | 0.755 (0.565–0.925) | 0.796 (0.628–0.938) |
| CLAM_MB | 0.833 (0.714–0.951) | 0.796 (0.679–0.904) | 0.821 (0.648–0.964) | 0.770 (0.603–0.917) | 0.767 (0.595–0.923) | 0.837 (0.674–0.972) |
| CLAM_SB | 0.832 (0.715–0.947) | 0.783 (0.667–0.896) | 0.839 (0.679–0.976) | 0.733 (0.564–0.889) | 0.744 (0.574–0.901) | 0.843 (0.672–0.982) |
| DSMIL | 0.682 (0.528–0.837) | 0.679 (0.546–0.808) | 0.658 (0.462–0.845) | 0.705 (0.537–0.851) | 0.692 (0.494–0.872) | 0.697 (0.509–0.872) |
| GABMIL | 0.716 (0.568–0.865) | 0.700 (0.562–0.821) | 0.615 (0.411–0.802) | 0.780 (0.613–0.921) | 0.729 (0.511–0.913) | 0.706 (0.533–0.869) |
| MaxMIL | 0.674 (0.520–0.827) | 0.646 (0.508–0.775) | 0.698 (0.501–0.874) | 0.599 (0.417–0.781) | 0.619 (0.420–0.805) | 0.696 (0.490–0.886) |
| TransMIL | 0.761 (0.627–0.895) | 0.729 (0.596–0.846) | 0.691 (0.512–0.851) | 0.761 (0.595–0.914) | 0.732 (0.524–0.911) | 0.751 (0.577–0.899) |

**Supplementary Table 6. Performance metrics for MIL approaches based on the L-DINO foundation model for ICI response prediction**

| L-DINO | AUC | Accuracy | Sensitivity | Specificity | Positive predictive value | Negative predictive value |
| --- | --- | --- | --- | --- | --- | --- |
| ABMIL | 0.722 (0.572–0.872) | 0.700 (0.571–0.821) | 0.672 (0.463–0.857) | 0.725 (0.548–0.883) | 0.691 (0.487–0.869) | 0.713 (0.531–0.878) |
| ACMIL | 0.764 (0.626–0.902) | 0.729 (0.591–0.850) | 0.752 (0.563–0.911) | 0.709 (0.520–0.880) | 0.702 (0.506–0.880) | 0.773 (0.589–0.927) |
| CLAM_MB | 0.717 (0.569–0.865) | 0.725 (0.596–0.846) | 0.679 (0.487–0.844) | 0.772 (0.606–0.915) | 0.735 (0.533–0.906) | 0.742 (0.567–0.892) |
| CLAM_SB | 0.741 (0.596–0.886) | 0.717 (0.587–0.841) | 0.679 (0.487–0.864) | 0.744 (0.580–0.894) | 0.722 (0.517–0.902) | 0.733 (0.553–0.900) |
| DSMIL | 0.615 (0.452–0.779) | 0.625 (0.483–0.758) | 0.586 (0.392–0.776) | 0.662 (0.472–0.847) | 0.601 (0.391–0.814) | 0.655 (0.470–0.830) |
| GABMIL | 0.741 (0.603–0.880) | 0.700 (0.563–0.825) | 0.752 (0.558–0.921) | 0.655 (0.478–0.831) | 0.673 (0.480–0.850) | 0.744 (0.547–0.923) |
| MaxMIL | 0.610 (0.453–0.776) | 0.617 (0.471–0.750) | 0.598 (0.404–0.783) | 0.625 (0.463–0.775) | 0.642 (0.421–0.819) | 0.643 (0.417–0.854) |
| TransMIL | 0.718 (0.572–0.864) | 0.704 (0.579–0.829) | 0.629 (0.429–0.812) | 0.770 (0.603–0.927) | 0.705 (0.487–0.903) | 0.707 (0.542–0.865) |

**Supplementary Table 7. AUROC scores on the held-out test set from five cross-validation models across foundation models and MIL algorithms**

| Backbone | MIL | Fold 0 | Fold 1 | Fold 2 | Fold 3 | Fold 4 | Average |
| --- | --- | --- | --- | --- | --- | --- | --- |
| UNI | ABMIL | 0.811 | 0.812 | 0.800 | 0.575 | 0.733 | 0.746 |
| ACMIL | 0.822 | 0.883 | 0.894 | 0.816 | 0.760 | 0.835 |
| CLAMMB | 0.862 | 0.873 | 0.828 | 0.851 | 0.804 | 0.844 |
| CLAMSB | 0.837 | 0.843 | 0.726 | 0.804 | 0.724 | 0.787 |
| DSMIL | 0.727 | 0.503 | 0.818 | 0.719 | 0.689 | 0.691 |
| GABMIL | 0.774 | 0.723 | 0.762 | 0.767 | 0.769 | 0.759 |
| MaxMIL | 0.617 | 0.513 | 0.608 | 0.465 | 0.657 | 0.572 |
| TransMIL | 0.839 | 0.904 | 0.873 | 0.827 | 0.766 | 0.842 |
| DINO | ABMIL | 0.661 | 0.736 | 0.731 | 0.776 | 0.706 | 0.722 |
| ACMIL | 0.815 | 0.788 | 0.727 | 0.769 | 0.731 | 0.764 |
| CLAMMB | 0.820 | 0.741 | 0.531 | 0.727 | 0.767 | 0.717 |
| CLAMSB | 0.795 | 0.746 | 0.708 | 0.699 | 0.759 | 0.741 |
| DSMIL | 0.636 | 0.557 | 0.622 | 0.552 | 0.710 | 0.615 |
| GABMIL | 0.795 | 0.802 | 0.819 | 0.694 | 0.596 | 0.741 |
| MaxMIL | 0.736 | 0.487 | 0.561 | 0.615 | 0.649 | 0.610 |
| TransMIL | 0.848 | 0.576 | 0.693 | 0.687 | 0.787 | 0.718 |
| GP | ABMIL | 0.663 | 0.743 | 0.538 | 0.773 | 0.767 | 0.697 |
| ACMIL | 0.822 | 0.837 | 0.927 | 0.748 | 0.722 | 0.811 |
| CLAMMB | 0.837 | 0.901 | 0.852 | 0.818 | 0.755 | 0.833 |
| CLAMSB | 0.799 | 0.809 | 0.920 | 0.829 | 0.801 | 0.832 |
| DSMIL | 0.593 | 0.680 | 0.748 | 0.703 | 0.687 | 0.682 |
| GABMIL | 0.701 | 0.722 | 0.635 | 0.788 | 0.736 | 0.716 |
| MaxMIL | 0.624 | 0.595 | 0.795 | 0.692 | 0.663 | 0.674 |
| TransMIL | 0.843 | 0.835 | 0.571 | 0.818 | 0.738 | 0.761 |

**Supplementary Table 8. Performance metrics for MIL approaches based on the GigaPath foundation model for ICI response prediction**

| GigaPath | AUC | Accuracy | Sensitivity | Specificity | Positive predictive value | Negative predictive value |
| --- | --- | --- | --- | --- | --- | --- |
| ABMIL | 0.697 (0.546–0.847) | 0.687 (0.554–0.812) | 0.580 (0.387–0.766) | 0.790 (0.627–0.927) | 0.723 (0.489–0.909) | 0.692 (0.521–0.850) |
| ACMIL | 0.811 (0.690–0.932) | 0.775 (0.650–0.883) | 0.767 (0.587–0.923) | 0.780 (0.599–0.935) | 0.755 (0.565–0.925) | 0.796 (0.628–0.938) |
| CLAM_MB | 0.833 (0.714–0.951) | 0.796 (0.679–0.904) | 0.821 (0.648–0.964) | 0.770 (0.603–0.917) | 0.767 (0.595–0.923) | 0.837 (0.674–0.972) |
| CLAM_SB | 0.832 (0.715–0.947) | 0.783 (0.667–0.896) | 0.839 (0.679–0.976) | 0.733 (0.564–0.889) | 0.744 (0.574–0.901) | 0.843 (0.672–0.982) |
| DSMIL | 0.682 (0.528–0.837) | 0.679 (0.546–0.808) | 0.658 (0.462–0.845) | 0.705 (0.537–0.851) | 0.692 (0.494–0.872) | 0.697 (0.509–0.872) |
| GABMIL | 0.716 (0.568–0.865) | 0.700 (0.562–0.821) | 0.615 (0.411–0.802) | 0.780 (0.613–0.921) | 0.729 (0.511–0.913) | 0.706 (0.533–0.869) |
| MaxMIL | 0.674 (0.520–0.827) | 0.646 (0.508–0.775) | 0.698 (0.501–0.874) | 0.599 (0.417–0.781) | 0.619 (0.420–0.805) | 0.696 (0.490–0.886) |
| TransMIL | 0.761 (0.627–0.895) | 0.729 (0.596–0.846) | 0.691 (0.512–0.851) | 0.761 (0.595–0.914) | 0.732 (0.524–0.911) | 0.751 (0.577–0.899) |
